# Supplementary material
Source: PubMed Central journal article supplement (PMC9857842)
Supplement: jamapsychiatry-e224634-s002.pdf [file jamapsychiatry-e224634-s002.pdf]

## Data Sharing Statement

Kessler. Evaluation of a Model to Target High-risk Psychiatric Inpatients for an Intensive Postdischarge Suicide Prevention Intervention. *JAMA Psychiatry*. Published January 18, 2023. doi:10.1001/jamapsychiatry.2022.4634

### Data

**Data available:** No

### Additional Information

**Explanation for why data not available:** The EHR data were derived from VHA electronic health records and contain protected health information. Access is governed by VA policies on data security in research and is restricted to researchers with VHA accreditation. The geospatial data were obtained with a license from a commercial data aggregation firm that does not allow data sharing beyond the license holder. The corresponding author may be contacted by email for further information.
